# Supplementary material for: Bifacial passivation towards efficient FAPbBr3-based inverted perovskite light-emitting diodes
Source: Royal Society of Chemistry journal article supplement (doi:10.1039/d0nr02323j), 2020-01-01
Supplement: d0nr02323j1.pdf [file d0nr02323j1.pdf]

## Supporting Information

### **Bifacial Passivation towards Efficient FAPbBr<sub>3</sub>-based Inverted Perovskite Light-emitting Diodes**

Miaozi Li, Juanhong Wang, Chaohuang Mai, Yangke Cun, Binbin Zhang, Guohui Huang, Danmu Yu, Jiali Li, Lan Mu, Lijuan Cao, Danyang Li, Junjie Wang, Jian Wang\*, and Junbiao Peng

Institute of Polymer Optoelectronic Materials and Devices, State Key Laboratory of Luminescent Materials and Devices, South China University of Technology, Guangzhou 510640, China.

E-mail: [jianwang@scut.edu.cn](mailto:jianwang@scut.edu.cn)

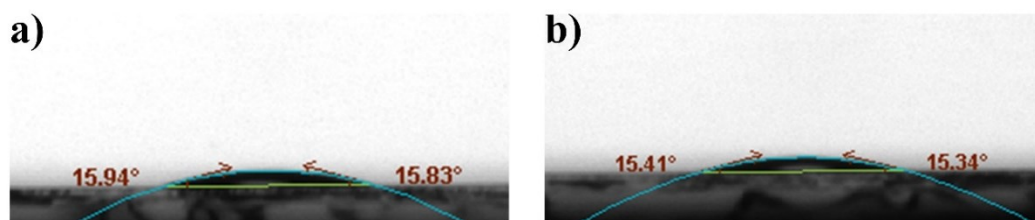

**Figure S1.** Contact angles of a) ZnO film and b) ZPM film.

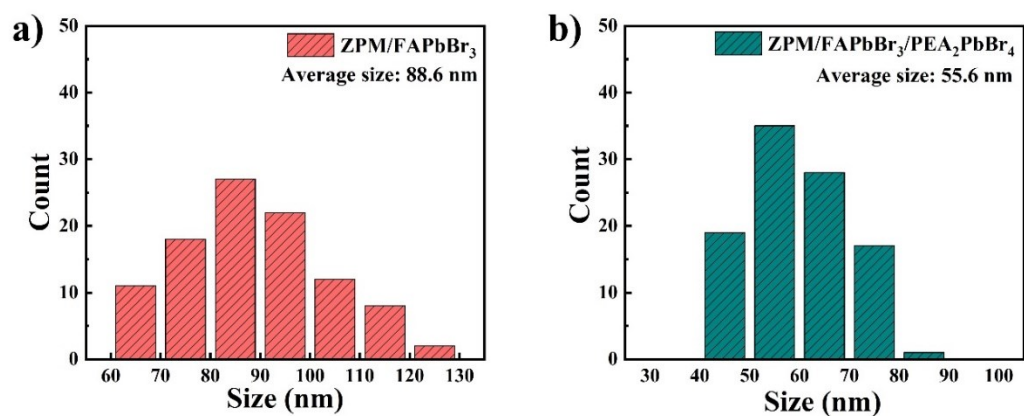

**Figure S2.** Grain size distribution of FAPbBr<sub>3</sub> films deposited on a) ZPM, and b) PEABr-modified FAPbBr<sub>3</sub> film on ZPM.

**Table S1.** Tri-exponential fitting parameters of the photoluminescence decay profiles shown in Figure 5c.

| Device                                         | $A_1$ (%) | $\tau_1$ (ns) | $A_2$ (%) | $\tau_2$ (ns) | $A_3$ (%) | $\tau_3$ (ns) | $\tau_{\text{avg}}$ (ns) |
|------------------------------------------------|-----------|---------------|-----------|---------------|-----------|---------------|--------------------------|
| ZnO/FAPbBr <sub>3</sub>                        | 15        | 3.13          | 49        | 15.58         | 36        | 53.92         | 27.51                    |
| ZPM/FAPbBr <sub>3</sub>                        | 10        | 5.12          | 48        | 23.89         | 42        | 80.91         | 45.87                    |
| ZPM/FAPbBr <sub>3</sub> /PEA <sub>2</sub> PbBr | 7         | 6.30          | 40        | 39.55         | 53        | 135.4         | 88.08                    |

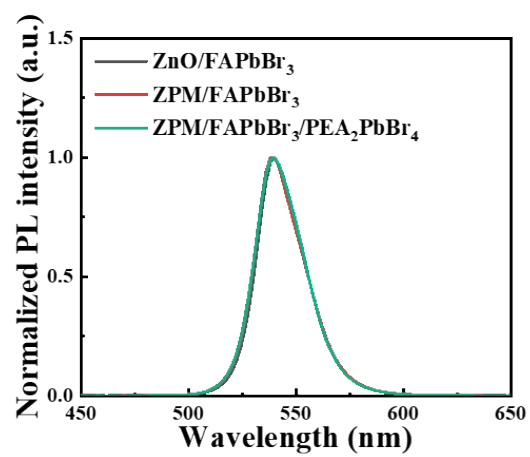

**Figure S3.** Normalized PL intensity different kinds of perovskite films.

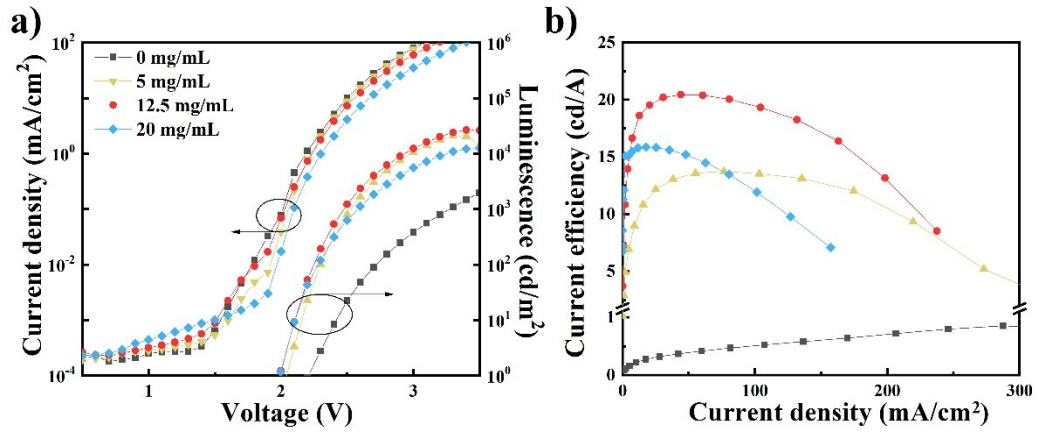

**Figure S4.** Device performance of ZPM/FAPbBr<sub>3</sub> devices with different concentrations of PVP in the PVP solution. a) *J-V-L* characteristics, b) *CE-J* characteristics.

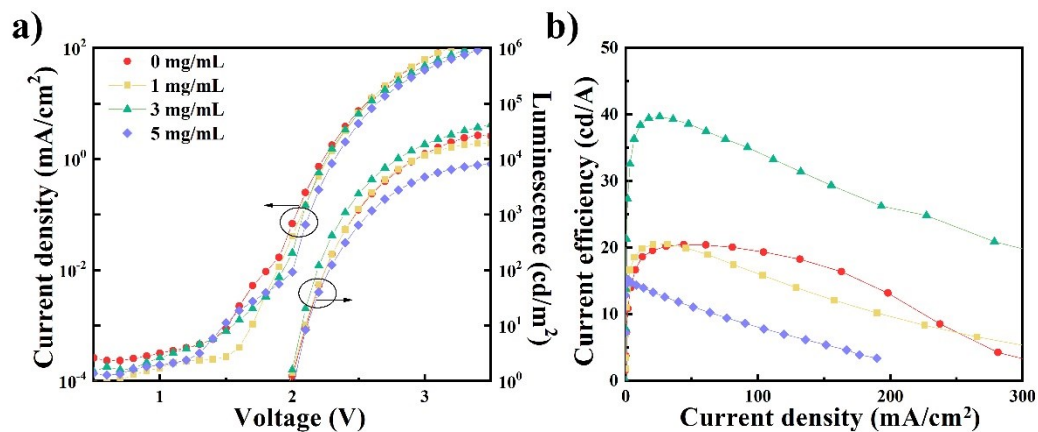

**Figure S5.** Device performance of ZPM/FAPbBr<sub>3</sub>/PEA<sub>2</sub>PbBr<sub>4</sub> devices with different concentrations of PEABr in the PEABr solution (the PVP concentration in the PVP solution is fixed at 12.5 mg/mL). a) *J-V-L* characteristics, b) *CE-J* characteristics.

**Table S2.** Device performance of the inverted green PeLEDs.

| <b>Device Structure</b>                                                                                                                       | <b><math>V_{on}</math><br/>[V]</b> | <b><math>L_{max}</math><br/>[cd/m<sup>2</sup>]</b> | <b><math>EQE_{max}</math><br/>[%]</b> | <b><math>PE_{max}</math><br/>[lm/W]</b> | <b>Ref.</b>          |
|-----------------------------------------------------------------------------------------------------------------------------------------------|------------------------------------|----------------------------------------------------|---------------------------------------|-----------------------------------------|----------------------|
| ITO/AZO:Cs/Cs <sub>10</sub> (MA <sub>0.17</sub> FA <sub>0.83</sub> )PbBr <sub>2.97</sub> I <sub>0.003</sub><br>/CuSGaSnO/ WO <sub>3</sub> /Au | 2.5                                | 553370                                             | 12.98                                 | 89.7                                    | 1                    |
| ITO/ZnO/PVP/Cs <sub>0.87</sub> MA <sub>0.13</sub> PbBr <sub>3</sub> /CBP/<br>MoO <sub>x</sub> /Al                                             | 2.9                                | 91000                                              | 10.4                                  | /                                       | 2                    |
| ITO/LZO/MIZO/CsPbBr <sub>3</sub><br>QDs/TCTA/NPD/HAT-CN/Al                                                                                    | 2.7                                | 22825                                              | 5.7                                   | 9.7                                     | 3                    |
| ITO/a-ZSO/CsPbBr <sub>3</sub> /NPD/MoO <sub>x</sub> /Al                                                                                       | /                                  | 496320                                             | 9.3                                   | 33.0                                    | 4                    |
| ITO/ZnO/PEI/MAPbBr <sub>3</sub> /TFB/MoO <sub>x</sub> /Al                                                                                     | 2.2                                | 20000                                              | 0.8                                   | 4                                       | 5                    |
| ITO/ZnO/PMMA/MAPbBr <sub>3</sub> /PVK/NPD/Al                                                                                                  | 5.0                                | 3450                                               | 2.8                                   | 4.4                                     | 6                    |
| ITO/ZnO/FAPbBr <sub>3</sub> /Poly-TPD/MoO <sub>x</sub> /Al                                                                                    | 1.9                                | 13062                                              | 1.2                                   | 3.1                                     | 7                    |
| ITO/ZnO/PEIE/FAPbBr <sub>3</sub> /TFB/MoO <sub>x</sub> /Al                                                                                    | 2.0                                | 7348                                               | 3.5                                   | 19.1                                    | 8                    |
| ITO/ZnO/FAPbBr <sub>3</sub> QDs/PVK/Poly-TPD/Pt                                                                                               | 4.1                                | 12998                                              | 6.0                                   | /                                       | 9                    |
| <b>ITO/ZPM/FAPbBr<sub>3</sub>/PEA<sub>2</sub>PbBr<sub>4</sub>/PVK/MoO<sub>x</sub><br/>/Al</b>                                                 | <b>2.0</b>                         | <b>60290</b>                                       | <b>9.0</b>                            | <b>46.4</b>                             | <b>This<br/>work</b> |



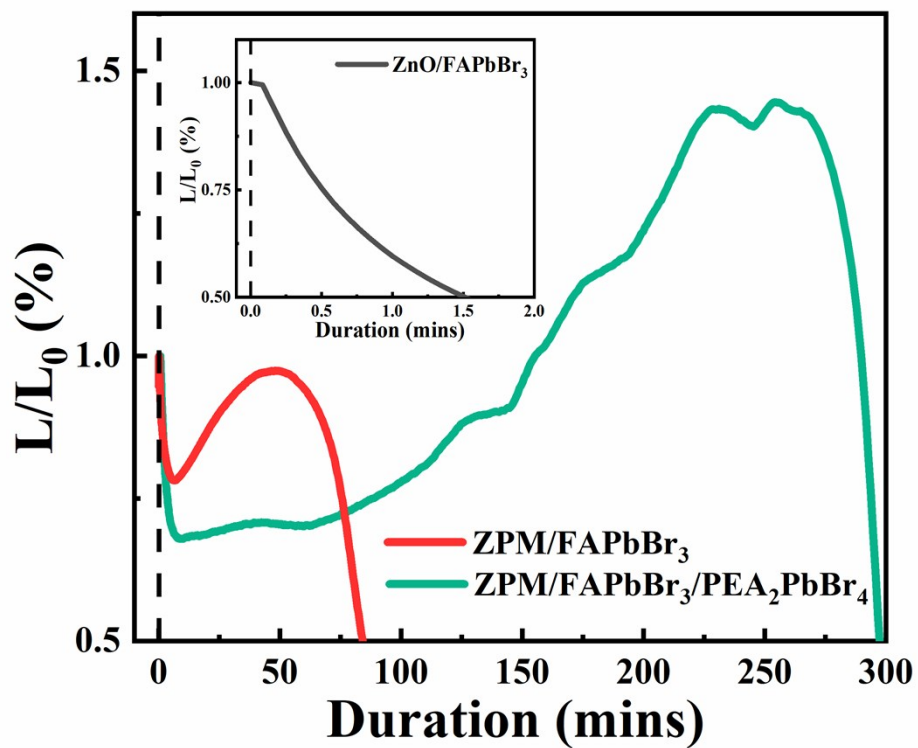

**Figure S6.** The operational lifetime at initial brightness of  $\sim 100$   $\text{cd}/\text{m}^2$ .

## Supplementary References

1. A. R. B. M. Yusoff, A. E. X. Gavim, A. G. Macedo, W. J. Da Silva, F. K. Schneider, M. A. M. Teridi, *Materials Today Chemistry*, 2018, **10**, 104-111.
2. L. Zhang, X. Yang, Q. Jiang, P. Wang, Z. Yin, X. Zhang, H. Tan, Y. M. Yang, M. Wei, B. R. Sutherland, E. H. Sargent, J. You, *Nat. Commun.*, 2017, **8**, 15640.
3. E. Moyen, H. Jun, H. Kim, J. Jang, *ACS Appl. Mater. Inter.*, 2018, **10**, 42647-42656.
4. K. Sim, T. Jun, J. Bang, H. Kamioka, J. Kim, H. Hiramatsu, H. Hosono, *Appl. Phys. Rev.*, 2019, **6**.
5. J. Wang, N. Wang, Y. Jin, J. Si, Z. Tan, H. Du, L. Cheng, X. Dai, S. Bai, H. He, Z. Ye, M. L. Lai, R. H. Friend, W. Huang, *Adv. Mater.* 2015, **27**, 2311-2316.
6. G. S. Kumar, B. Pradhan, T. Kamilya, S. Acharya, *B. Chem. Soc. Jpn.*, 2018, **91**, 1241-1248.
7. L. Meng, E. Yao, Z. Hong, H. Chen, P. Sun, Z. Yang, G. Li, Y. Yang, *Adv. Mater.*, 2017, **29**.
8. Y. Zhu, X. Zhao, B. Zhang, B. Yao, Z. Li, Y. Qu, Z. Xie, *Org. Electron.*, 2018, **55**, 35-41.
9. F. Di Stasio, I. Ramiro, Y. Bi, S. Christodoulou, A. Stavrinnadis, G. Konstantatos, *Chem. Mater.*, 2018, **30**, 6231-6235.
